# Supplementary material for: Seed priming with polyethylene glycol regulating the physiological and molecular mechanism in rice (Oryza sativa L.) under nano-ZnO stress
Source: PubMed Central journal article supplement (PMC4588511; doi:10.1038/srep14278), 2015-09-30
Supplement: srep14278-s1.pdf [file srep14278-s1.pdf]

**Seed priming with polyethylene glycol regulating the physiological and molecular mechanism in rice (*Oryza sativa* L.) under nano-ZnO stress**

Sheteiwy Mohamed Salah<sup>1,2</sup>, Guan Yajing<sup>1</sup>, Cao Dongdong<sup>3</sup>, Li Jie<sup>1</sup>, Nawaz Aamir<sup>1,4</sup>, Hu Qijuan<sup>1</sup>, Hu Weimin<sup>1</sup>, Ning Mingyu<sup>5</sup>, Hu Jin<sup>1,\*</sup>

<sup>1</sup>Seed Science Center, College of Agriculture and Biotechnology, Zhejiang University, Hangzhou 310058, China, <sup>2</sup>Department of Agronomy, Faculty of Agriculture, Mansoura University, Mansoura 35516, Egypt, <sup>3</sup>Zhejiang Nongke Seed industry Limited Company, Hangzhou, 310021, China, <sup>4</sup>Faculty of Agricultural Sciences and Technology, Bahauddin Zakariya University Multan, 60000 Pakistan; <sup>5</sup>National Agricultural Technology Extension Service Center, China.

---

\* Corresponding author. Tel.: +86 57188982318; fax: +86 57188982318; E-mail address: [jhu@zju.edu.cn](mailto:jhu@zju.edu.cn)

**Table S1**

Sequences of oligonucleotide primers used in QRT-PCR

| Locus        | Primer name | Sequence (5'-3')          |
|--------------|-------------|---------------------------|
| Os03g0285700 | Os-APXa-F   | GCTGAGTGACCCTGCCTTCC      |
|              | Os-APXa-R   | CCCCAGTTCGGAGAGCTTGA      |
| Os07g0694700 | Os-APXb-F   | ACCCTGGGAAGATGCCACAA      |
|              | Os-APXb-R   | GCCTTCCTTCTCGCCACTCA      |
| Os02g0115700 | Os-CATa-F   | GGAAGCTGTTTCGTCCAGGTGAT   |
|              | Os-CATa-R   | TCCGGCCATGTCTTGGTGTC      |
| Os06g0727200 | Os-CATb-F   | TTCTCCAGCGGTGGGTTGAT      |
|              | Os-CATb-R   | CCAAGGGACGCATCACACTG      |
| Os03g0131200 | Os-CATc-F   | CACTCTCTGACCCTCGCCTCA     |
|              | Os-CATc-R   | AGACGGCTCGCCAGTTTCTG      |
| Os03g0351500 | Os-SOD1-F   | GGGAGATGGTCCCACCACTG      |
|              | Os-SOD1-R   | GGCCCAGTTGACATGCAACC      |
| Os03g0219200 | Os-SOD2-F   | CAACTCTACCGGGCCCCATT      |
|              | Os-SOD2-R   | GGCTACTATGTTTCCCAGGTC     |
| Os07g0665200 | Os-SOD3-F   | GCCAGATCCCCCTTACTGGA      |
|              | Os-SOD3-R   | CCCCAGCATTTCCAGTGGTC      |
| Os03g0718100 | Os-ACT1-F   | CTTCATAGGAATGGAAGCTGCGGGT |
|              | Os-ACT1-R   | CGACCACCTTGATCTTCATGCTGCT |

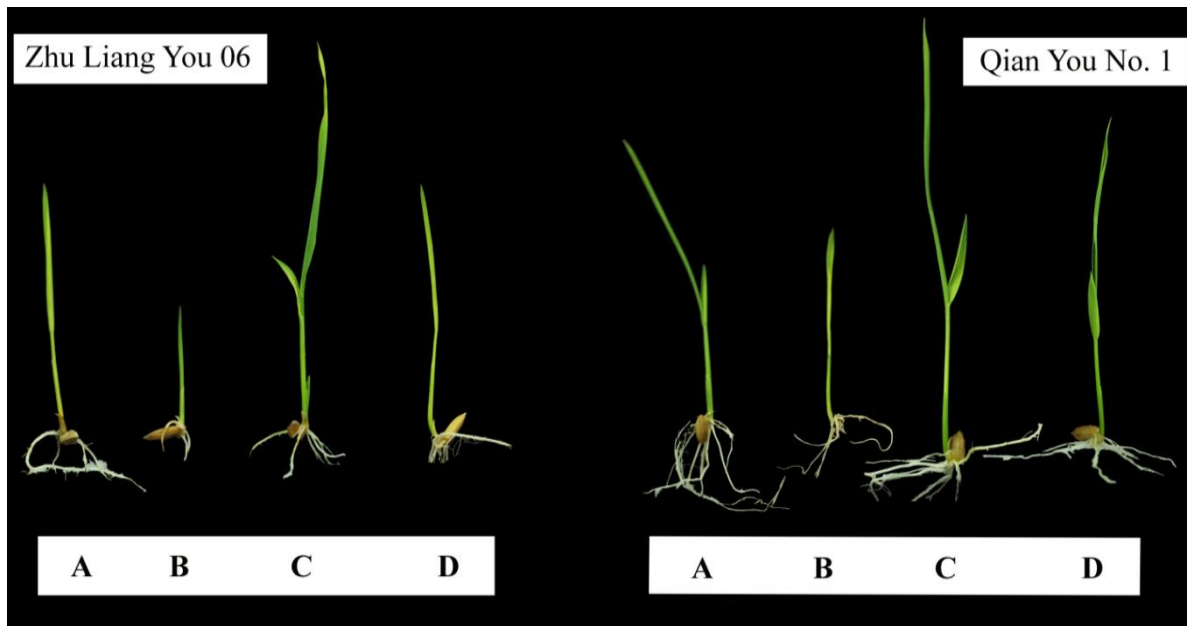

**Fig. S1.** Seedlings phenotypes of *Oryza sativa* (Zhu Liang You 06 and Qian You No.1) two weeks old, exposed to different concentrations of nano-ZnO.A [without priming and without stress (control)], B [without priming and high stress ( $750 \text{ mg L}^{-1}$ )], C [priming with PEG and without stress] and D [priming with PEG and high stress ( $750 \text{ mg L}^{-1}$ )].
